# Supplementary material for: Ultralow-power non-volatile memory cells based on P(VDF-TrFE) ferroelectric-gate CMOS silicon nanowire channel field-effect transistors
Source: Royal Society of Chemistry journal article supplement (doi:10.1039/c5nr02019k), 2015-01-01
Supplement: c5nr02019k1.pdf [file c5nr02019k1.pdf]

## Supporting Information

### **Ultralow-power Non-volatile Memory Cells based on P(VDF-TrFE) Ferroelectric-gate CMOS Silicon Nanowire Channel Field-Effect Transistors**

By Ngoc Huynh Van, Jae-Hyun Lee<sup>1</sup>, Dongmok Whang<sup>1</sup> and Dae Joon Kang\*

[\*] Prof. Dae Joon Kang, Ngoc Huynh Van

Department of Physics, Sungkyunkwan University, Suwon 440-746, Republic of Korea.

E-Mail: [djkang@skku.edu](mailto:djkang@skku.edu)

Jae-Hyun Lee, Prof. Dongmok Whang

<sup>1</sup>School of Advanced Materials Science and Engineering, SKKU Advanced Institute of Nanotechnology, Sungkyunkwan University, Suwon 440-746, Republic of Korea.

## 1. Four probe measurements

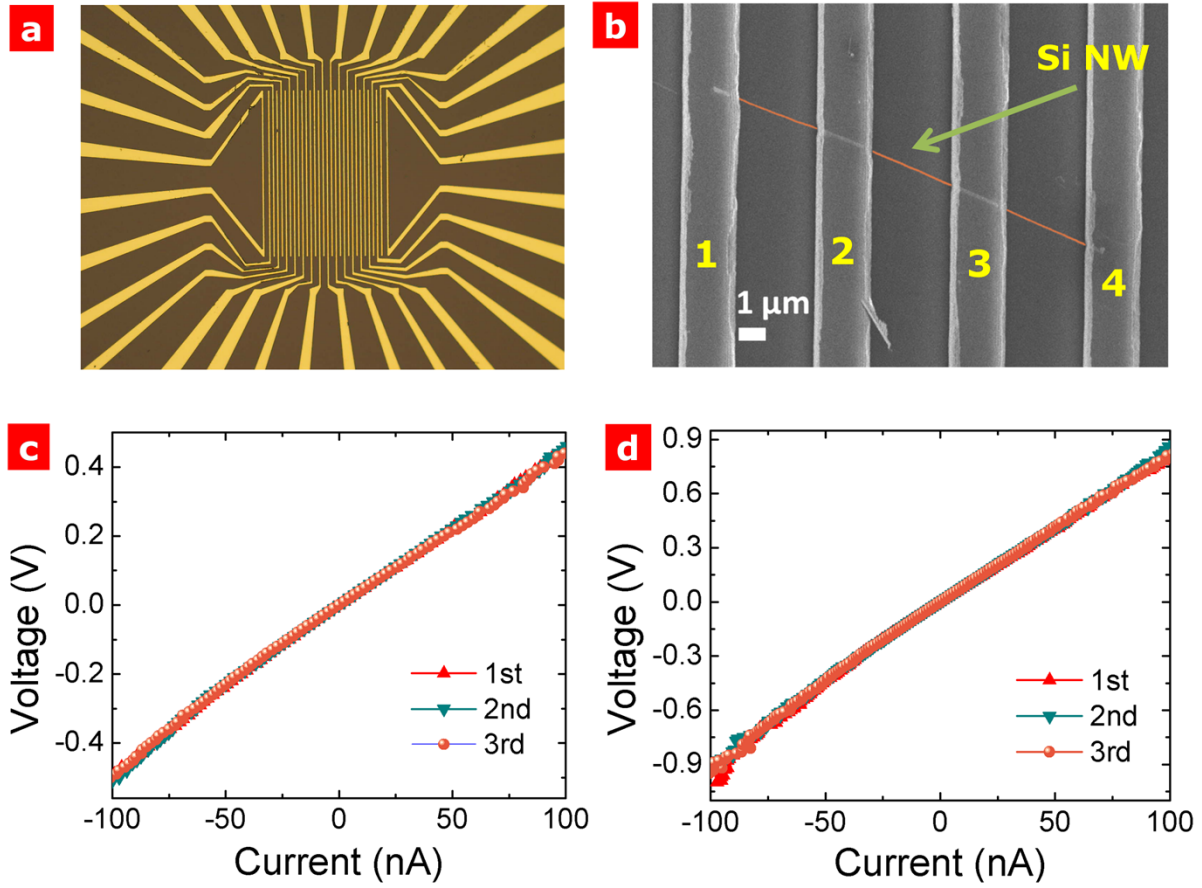

**Fig. S1** (a) Optical and (b) FE-SEM images of Si NW FET devices; four probe measurements of n-type (c) and p-type (d) Si NWs.

The n-type Si NW resistance ( $R$ ) of  $4.44 \times 10^6 \Omega$  was extrapolated from the linear region of the current–voltage curve of four-probe measurements from Fig. S1c. The resistivity  $\rho = 0.21 \Omega \text{ cm}$  was calculated according to  $\rho = RA/L$ , where  $A = \pi r^2$  is the Si NW cross section,  $L$  is the conducting channel length of the nanowire ( $\sim 5 \mu\text{m}$ ), and  $r$  is the radius of the nanowire ( $\sim 27.5 \text{ nm}$ ). The resistance,  $R = 8.1 \times 10^6 \Omega$ , and resistivity,  $\rho = 0.38 \Omega \text{ cm}$ , were calculated for p-type Si NWs from Fig. S1d.

## 2. Electrical transport properties of single n- and p-type Si NW FET devices

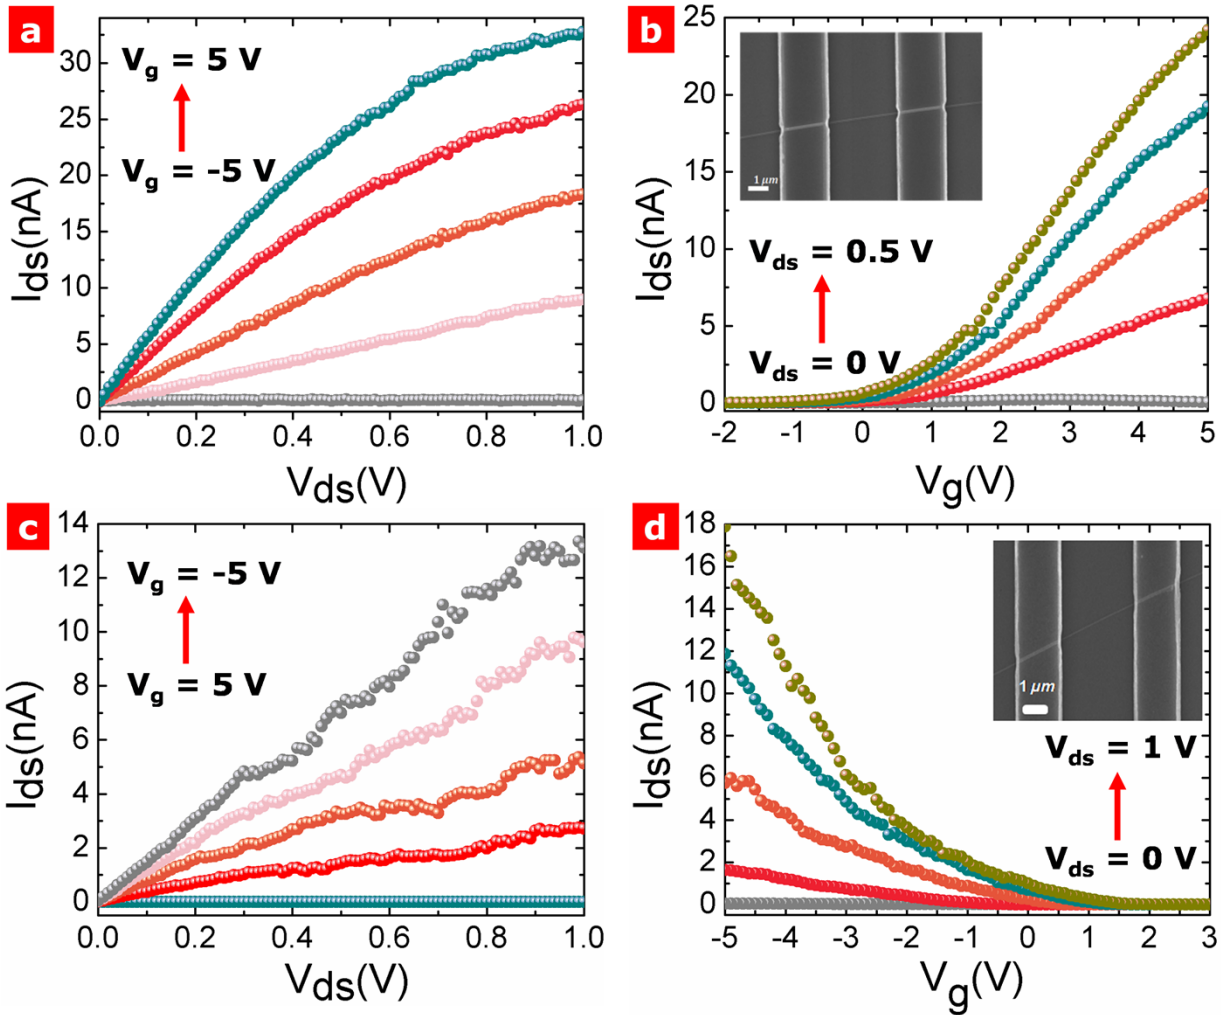

**Fig. S2** Electrical transport properties of single n- and p-type Si NW FET devices at ambient conditions. (a), (c)  $I_{ds}$ - $V_{ds}$  output characteristics and (b), (d)  $I_{ds}$ - $V_g$  transfer characteristics of n- and p-type Si NW FETs, respectively.

To investigate the electrical properties of n-type and p-type Si NWs, we prepared typical NW FETs on a 100 nm thick  $\text{SiO}_2$  layer on a heavily boron doped Si (p++ Si) substrate; the a-Si acted as a back gate electrode. Figure S2a shows the drain current versus drain-source voltage ( $I_{ds}$ - $V_{ds}$ ) curves for a single n-type Si NW FET. The conductance of the NW increases monotonically as the gate potential increases from -5 V to +5 V, exhibiting a typical n-type Si NW FET behavior.

Figure S2b shows the drain current versus gate-source voltage ( $I_{ds}$ - $V_g$ ) curves obtained by sweeping the gate voltage continuously from  $-5$  V to  $5$  V at a drain voltage ranging from  $0$  to  $0.5$  V. The transconductance ( $g_m$ ) and field effect electron mobility ( $\mu_e$ ) of the back gate NW FETs were determined from the  $I_{ds}$ - $V_g$  curves using the following equations:  $g_m = dI_{ds}/dV_g$  and  $\mu_e = g_m L^2 / C_{ox} V_{ds}$ .<sup>1</sup> The gate oxide capacitance ( $C_{ox}$ ) of a cylindrical wire on a planar substrate can be estimated by  $C_{ox} = 2\pi\epsilon_r\epsilon_0 L / \cosh^{-1}(1 + t_{ox}/r)$  using a relative dielectric constant ( $\epsilon_r$ ) of  $3.9$ , a  $\text{SiO}_2$  gate dielectric layer thickness ( $t_{ox}$ ) of  $100$  nm, a nanowire conducting channel length ( $L$ ) of approximately  $5$   $\mu\text{m}$ , and a nanowire radius ( $r$ ) of approximately  $27.5$  nm. For n-type Si NW FETs on a  $\text{SiO}_2/\text{Si}$  substrate, a threshold voltage ( $V_{th}$ ) of  $-1$  V and a transconductance ( $g_m$ ) of  $9.7$  nS were extrapolated from the linear region of the  $I_{ds}$ - $V_g$  curve at a value of  $0.5$  V for the  $V_{ds}$ . The field-effect electron mobility ( $\mu_e$ ) and resistivity ( $\rho$ ) for Si NW was calculated from four-probe measurements and found to be  $9.9$   $\text{cm}^2 \text{V}^{-1} \text{s}^{-1}$  and  $0.21$   $\Omega \text{cm}$ , respectively (Fig. S1c). Electron carrier concentration ( $n_e$ ) was calculated to be  $2.58 \times 10^{17} \text{e/cm}^3$  using the equation,  $n_e = C_{ox} V_{th} / e\pi r^2 L$ .<sup>2</sup> The subthreshold swing given as  $S.S = \log[dV_g/d(\log I_{ds})]$  was estimated to be  $168$  mV  $\text{dec}^{-1}$ .

The same calculation method is applicable for p-type Si NW FETs. A  $V_{th}$  of  $1$  V,  $g_m$  of  $14.1$  nS, and a field effect hole mobility ( $\mu_h$ ) of  $7.2$   $\text{cm}^2 \text{V}^{-1} \text{s}^{-1}$  were calculated from Fig. S2c and d, and  $\rho$  was estimated to be  $0.38$   $\Omega \text{cm}$  from four-probe measurements (Fig. S1d in the Supporting Information). Hole carrier concentration ( $n_h$ ) was estimated to be  $2.58 \times 10^{17} \text{h cm}^{-3}$  using the equation  $n_h = C_{ox} V_{th} / q\pi r^2 L$ .<sup>2</sup> The subthreshold swing ( $S.S$ ) value was approximately  $216$  mV  $\text{dec}^{-1}$ . The subthreshold swing values of n-type and p-type Si NW FETs are small enough for low power consumption devices.

## References

- 1 L. Liao, H. J. Fan, B. Yan, Z. Zhang, L. L. Chen, B. S. Li, G. Z. Xing, Z. X. Shen, T. Wu, X. W. Sun, J. Wang, T. Yu, *ACS Nano*, 2009, **3**, 700-706.
- 2 J. Goldberger, D. J. Sirbuly, M. Law, P. Yang, *J. Phys. Chem. B*, 2005, **109**, 9-14.
